# Supplementary material for: Impaired mitochondrial oxidative metabolism in skeletal progenitor cells leads to musculoskeletal disintegration
Source: PubMed Central journal article supplement (PMC9652319; doi:10.1038/s41467-022-34694-8), 2022-11-11
Supplement: 41467_2022_34694_MOESM3_ESM.pdf [file 41467_2022_34694_MOESM3_ESM.pdf]

The full content of this file cannot be displayed with your current PDF viewer. Please update to the latest possible version to view this document.
